# Supplementary material for: Study of multimodal light emissions from Pr3+/Yb3+ doped NaLa(MoO4)2 phosphors for optoelectronic devices and plant-growth applications
Source: Royal Society of Chemistry journal article supplement (doi:10.1039/d4dt02532f), 2024-12-19
Supplement: d4dt02532f1.pdf [file d4dt02532f1.pdf]

## Supporting Information

### Study of multimodal light emissions from Pr<sup>3+</sup>/Yb<sup>3+</sup> doped NaLa(MoO<sub>4</sub>)<sub>2</sub> phosphors for optoelectronic devices and plant-growth applications

<sup>a</sup>Sonali Tomar, <sup>b,c</sup>Neeraj Kumar Mishra, <sup>d</sup>Vaibhav Chauhan, <sup>b</sup>Kaushal Kumar, <sup>a</sup>C. Shivakumara\*

<sup>a</sup>Solid State and Structural Chemistry Unit, Indian Institute of Science,  
Bangalore - 560012, India

<sup>b</sup>Optical Materials and Bio-imaging Research Laboratory, Department of Physics,  
Indian Institute of Technology (Indian School of Mines), Dhanbad - 826004, India

<sup>c</sup>Department of Chemical Sciences, Indian Institute of Science Education and  
Research (IISER), Mohali, Punjab -140306, India

<sup>d</sup>Atomic and Molecular Physics Division, Bhabha Atomic Research Center,  
Mumbai – 400085, India

#### Contents

**Figure S1.** Rietveld plot of (a) NaLa(MoO<sub>4</sub>)<sub>2</sub>, (b) NaLa<sub>0.97</sub>Pr<sub>0.03</sub>(MoO<sub>4</sub>)<sub>2</sub> and (c) NaLa<sub>0.94</sub>Pr<sub>0.03</sub>Yb<sub>0.03</sub>(MoO<sub>4</sub>)<sub>2</sub>, (d) crystal structure of NaLa<sub>0.97</sub>Pr<sub>0.03</sub>(MoO<sub>4</sub>)<sub>2</sub> and (e) XRD patterns of NaLa<sub>0.97-y</sub>Pr<sub>0.03</sub>Yb<sub>y</sub>(MoO<sub>4</sub>)<sub>2</sub> (0.00 ≤ x ≤ 0.14) phosphors.

**Figure S2.** High-resolution XPS spectra of NaLa<sub>0.92</sub>Pr<sub>0.03</sub>Yb<sub>0.05</sub>(MoO<sub>4</sub>)<sub>2</sub>: (a) XPS scan Survey (b) Na 1s spectra (c) La 3d spectra (d) Pr 3d, (e) Yb 4d, (f) Mo 3d spectra and (g) O 1s spectra.

**Figure S3.** FTIR spectra of NaLa<sub>1-x</sub>Pr<sub>x</sub>(MoO<sub>4</sub>)<sub>2</sub> and NaLa<sub>0.97-y</sub>Pr<sub>0.03</sub>Yb<sub>y</sub>(MoO<sub>4</sub>)<sub>2</sub> phosphors.

**Figure S4.** (a) Diffusion reflectance spectra of pure, Pr<sup>3+</sup> doped and Pr<sup>3+</sup>/Yb<sup>3+</sup> doped NLMO and (b) Kubelka- Monk plot of Pr<sup>3+</sup> doped and Pr<sup>3+</sup>/Yb<sup>3+</sup> doped NLMO.

**Figure S5.** log(I/x) Vs log(x) plot of NaLa<sub>0.97</sub>Pr<sub>0.03</sub>(MoO<sub>4</sub>)<sub>2</sub> (0.01 ≤ x ≤ 0.11).

#### Tables

**Table S1.** Rietveld refined lattice parameters and unit cell volume for NaLa<sub>1-x</sub>Pr<sub>x</sub>(MoO<sub>4</sub>)<sub>2</sub> (0.00 ≤ x ≤ 0.11) compounds.

**Table S2.** Rietveld refined structural parameters for NaLa<sub>0.97</sub>Pr<sub>0.03</sub>(MoO<sub>4</sub>)<sub>2</sub> compounds.

**Table S3.** Rietveld refined structural parameters for NaLa<sub>0.94</sub>Pr<sub>0.03</sub>Yb<sub>0.03</sub>(MoO<sub>4</sub>)<sub>2</sub> compounds.

**Table S4.** Variations of decay time ( $\tau$ ), energy transfer efficiency ( $\eta_{ETE}$ ), and quantum cutting efficiency ( $\eta_{QE}$ ) in  $\text{Pr}^{3+}/\text{Yb}^{3+}$  codoped NLMO samples on fixing the amount of  $\text{Pr}^{3+}$  and varying the amount of  $\text{Yb}^{3+}$  for the emission band 647 nm under 449 nm excitation.

### Tables

**Table S1.** Rietveld refined lattice parameters and unit cell volume for  $\text{NaLa}_{1-x}\text{Pr}_x(\text{MoO}_4)_2$  ( $0.00 \leq x \leq 0.11$ ) compounds.

| Compounds                                            | Lattice parameters (Å) |           | Cell volume (Å <sup>3</sup> ) |
|------------------------------------------------------|------------------------|-----------|-------------------------------|
|                                                      | <i>a</i>               | <i>c</i>  |                               |
| $\text{NaLa}(\text{MoO}_4)_2$                        | 5.347(5)               | 11.753(1) | 336.08(8)                     |
| $\text{NaLa}_{0.99}\text{Pr}_{0.01}(\text{MoO}_4)_2$ | 5.345(6)               | 11.745(8) | 335.63(8)                     |
| $\text{NaLa}_{0.97}\text{Pr}_{0.03}(\text{MoO}_4)_2$ | 5.344(2)               | 11.741(3) | 335.33(4)                     |
| $\text{NaLa}_{0.95}\text{Pr}_{0.05}(\text{MoO}_4)_2$ | 5.343(1)               | 11.738(5) | 335.10(7)                     |
| $\text{NaLa}_{0.93}\text{Pr}_{0.07}(\text{MoO}_4)_2$ | 5.341(5)               | 11.735(7) | 334.83(7)                     |
| $\text{NaLa}_{0.91}\text{Pr}_{0.09}(\text{MoO}_4)_2$ | 5.339(7)               | 11.734(8) | 334.58(8)                     |
| $\text{NaLa}_{0.89}\text{Pr}_{0.11}(\text{MoO}_4)_2$ | 5.339(6)               | 11.735(5) | 334.66(4)                     |

**Table S2.** Rietveld refined structural parameters for  $\text{NaLa}_{0.97}\text{Pr}_{0.03}(\text{MoO}_4)_2$  compounds.

| Atoms | Oxidation State | Wyckoff Notation | Positional parameters |           |           | $B_{\text{iso}}$ | Occupancy |
|-------|-----------------|------------------|-----------------------|-----------|-----------|------------------|-----------|
|       |                 |                  | <i>x</i>              | <i>y</i>  | <i>z</i>  |                  |           |
| Na    | +1              | 4b               | 0.0000                | 0.2500    | 0.6250    | 0.500            | 1         |
| La/Pr | +3              | 4b               | 0.0000                | 0.2500    | 0.6250    | 0.500            | 0.97/0.03 |
| Mo    | +6              | 4a               | 0.0000                | 0.2500    | 0.1250    | 0.500            | 2         |
| O     | -2              | 16f              | 0.7674(7)             | 0.1122(4) | 0.0426(2) | 0.500            | 8         |

Crystal system = Tetragonal, Space group =  $I41/a$  (88),

Lattice parameters,  $a = 5.344(2)$  Å,  $c = 11.741(3)$  Å, Unit cell volume =  $335.33(4)$  Å<sup>3</sup>,

$R_{\text{Factors}}$ ;  $R_p = 3.06$ ,  $R_{\text{wp}} = 4.11$ ,  $R_{\text{exp}} = 2.33$ ,  $\chi^2 = 3.11$ ,  $R_{\text{Bragg}} = 6.90$ ,  $R_F = 6.99$ .

**Table S3.** Rietveld refined structural parameters for NaLa<sub>0.94</sub>Pr<sub>0.03</sub>Yb<sub>0.03</sub>(MoO<sub>4</sub>)<sub>2</sub> compounds.

| Atoms    | Oxidation State | Wyckoff Notation | Positional parameters |           |           | $B_{\text{iso}}$ | Occupancy      |
|----------|-----------------|------------------|-----------------------|-----------|-----------|------------------|----------------|
|          |                 |                  | $x$                   | $y$       | $z$       |                  |                |
| Na       | +1              | 4b               | 0.0000                | 0.2500    | 0.6250    | 0.500            | 1              |
| La/Pr/Yb | +3              | 4b               | 0.0000                | 0.2500    | 0.6250    | 0.500            | 0.94/0.03/0.03 |
| Mo       | +6              | 4a               | 0.0000                | 0.2500    | 0.1250    | 0.500            | 2              |
| O        | -2              | 16f              | 0.7749(3)             | 0.1154(7) | 0.0427(8) | 0.500            | 8              |

Crystal system = Tetragonal, Space group =  $I41/a$  (88),

Lattice parameters,  $a = 5.340(9)$  Å,  $c = 11.733(4)$  Å, Unit cell volume =  $334.71(2)$  Å<sup>3</sup>,

$R_{\text{Factors}}$ ;  $R_{\text{p}} = 4.61$ ,  $R_{\text{wp}} = 5.98$ ,  $R_{\text{exp}} = 4.16$ ,  $\chi^2 = 2.07$ ,  $R_{\text{Bragg}} = 3.77$ ,  $R_{\text{F}} = 7.03$ .

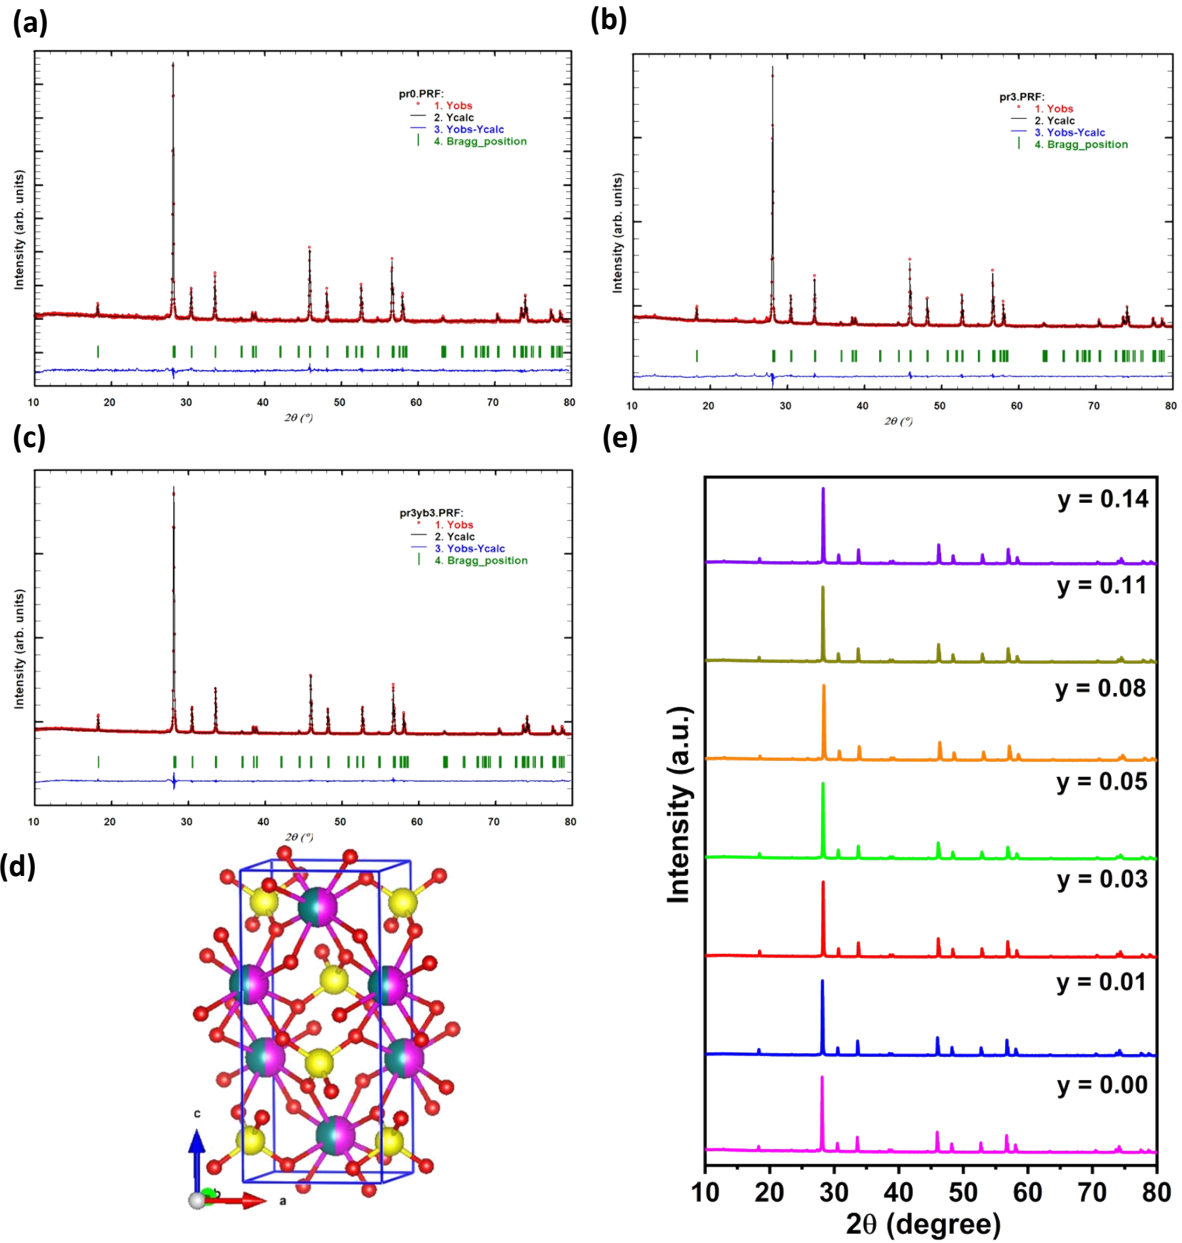

**Figure S1.** Rietveld plot of (a)  $\text{NaLa}(\text{MoO}_4)_2$ , (b)  $\text{NaLa}_{0.97}\text{Pr}_{0.03}(\text{MoO}_4)_2$  and (c)  $\text{NaLa}_{0.94}\text{Pr}_{0.03}\text{Yb}_{0.03}(\text{MoO}_4)_2$ , (d) crystal structure of  $\text{NaLa}_{0.97}\text{Pr}_{0.03}(\text{MoO}_4)_2$  and (e) XRD patterns of  $\text{NaLa}_{0.97-y}\text{Pr}_{0.03}\text{Yb}_y(\text{MoO}_4)_2$  ( $0.00 \leq y \leq 0.14$ ) phosphors.

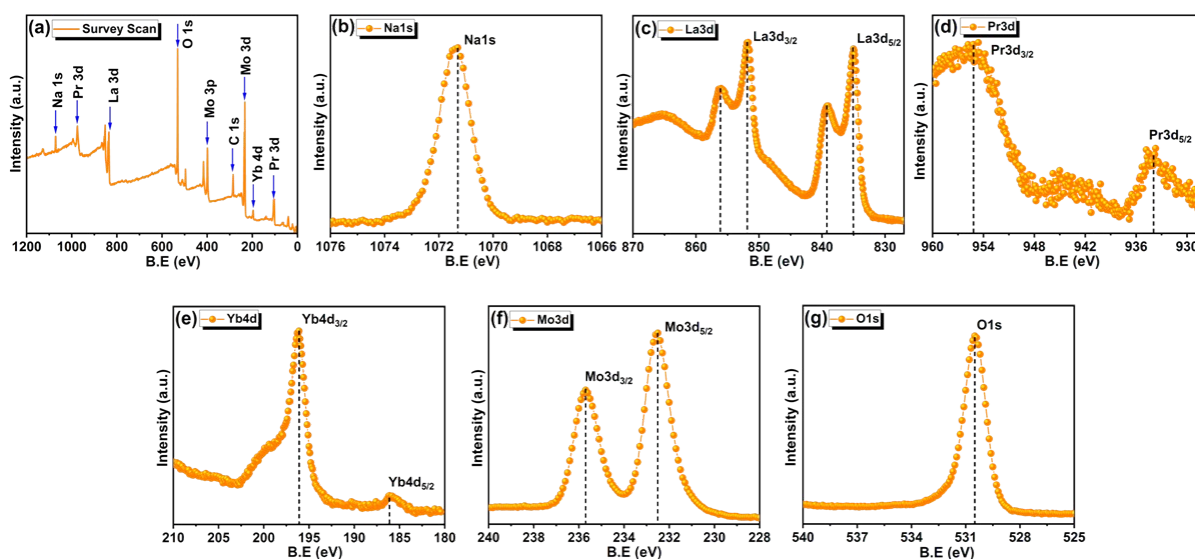

**Figure S2.** High-resolution XPS spectra of  $\text{NaLa}_{0.92}\text{Pr}_{0.03}\text{Yb}_{0.05}(\text{MoO}_4)_2$ : (a) XPS scan Survey (b) Na 1s spectra (c) La 3d spectra (d) Pr 3d, (e) Yb 4d, (f) Mo 3d spectra and (g) O 1s spectra.

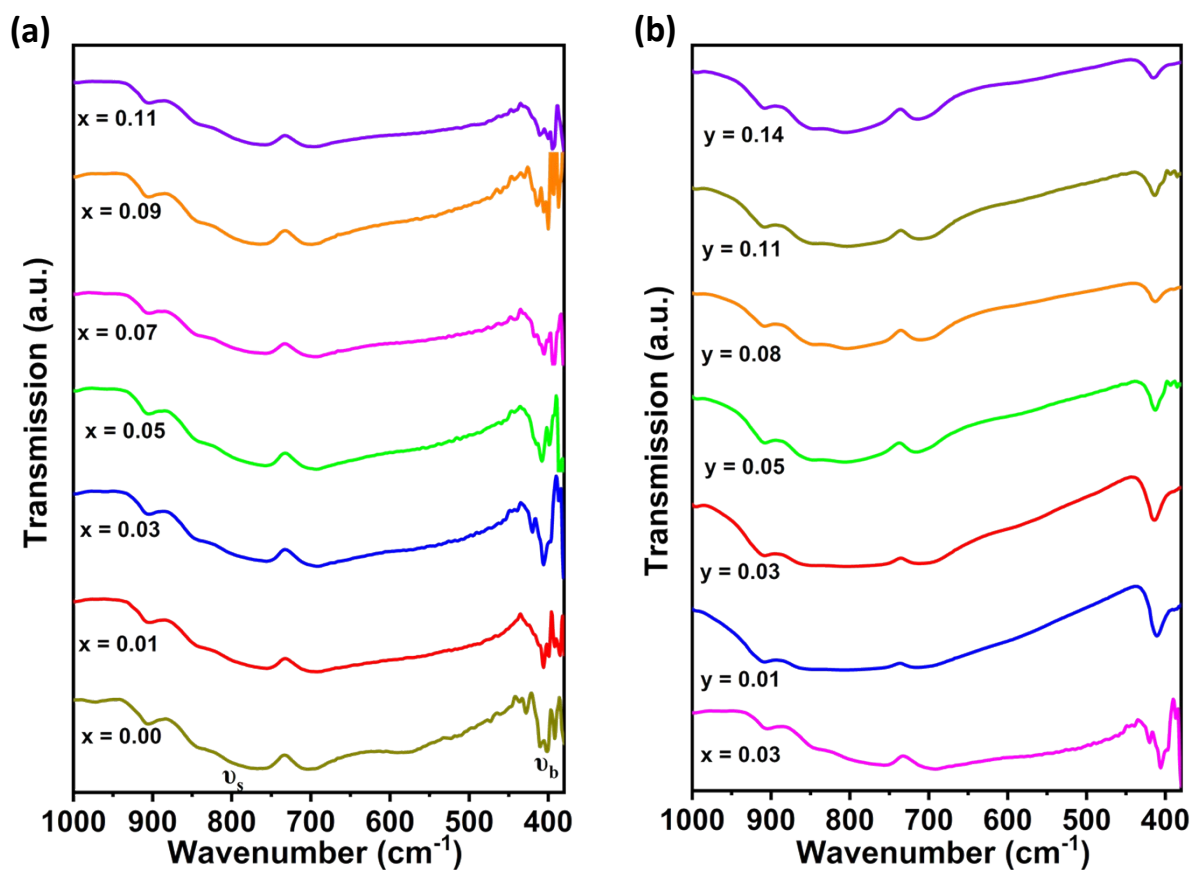

**Figure S3.** FTIR spectra of  $\text{NaLa}_{1-x}\text{Pr}_x(\text{MoO}_4)_2$  and  $\text{NaLa}_{0.97-y}\text{Pr}_{0.03}\text{Yb}_y(\text{MoO}_4)_2$  phosphors.

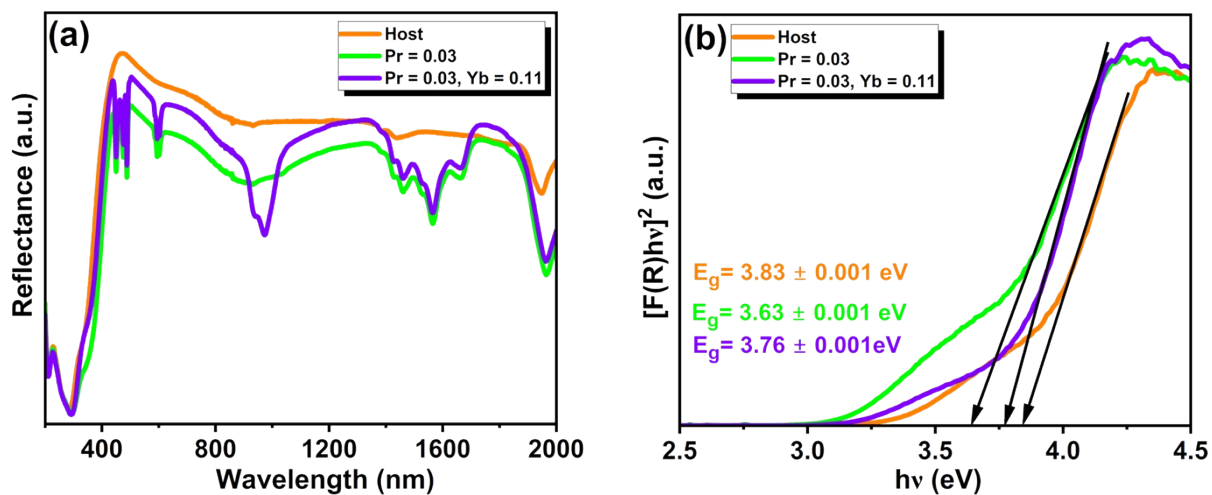

**Figure S4.** (a) Diffusion reflectance spectra of pure,  $\text{Pr}^{3+}$  doped and  $\text{Pr}^{3+}/\text{Yb}^{3+}$  doped NLMO and (b) Kubelka- Monk plot of  $\text{Pr}^{3+}$  doped and  $\text{Pr}^{3+}/\text{Yb}^{3+}$  doped NLMO.

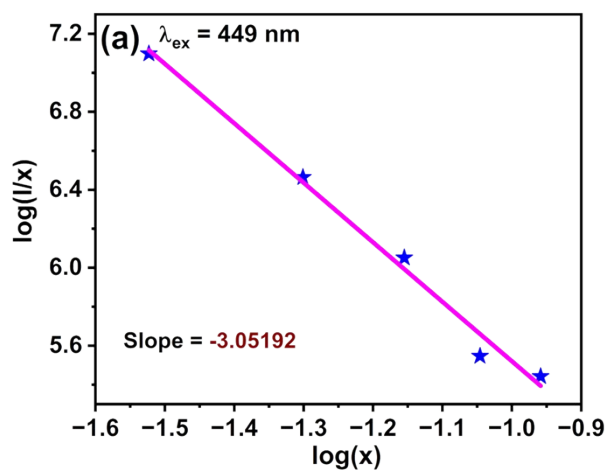

**Figure S5.**  $\log(I/x)$  Vs  $\log(x)$  plot of  $\text{NaLa}_{0.97}\text{Pr}_{0.03}(\text{MoO}_4)_2$  ( $0.01 \leq x \leq 0.11$ ).

**Table S4.** Variations of decay time ( $\tau$ ), energy transfer efficiency ( $\eta_{ETE}$ ), and quantum cutting efficiency ( $\eta_{QE}$ ) in Pr<sup>3+</sup>/Yb<sup>3+</sup> codoped NLMO samples on fixing the amount of Pr<sup>3+</sup> and varying the amount of Yb<sup>3+</sup> for the emission band 647 nm under 449 nm excitation.

| Sample                                                                                      | $\tau$ ( $\mu$ S) | $\eta_{ETE}$ (%) | $\eta_{QE}$ (%) |
|---------------------------------------------------------------------------------------------|-------------------|------------------|-----------------|
| NaLa <sub>0.97</sub> Pr <sub>0.03</sub> (MoO <sub>4</sub> ) <sub>2</sub>                    | 6.52              | -                | 100             |
| NaLa <sub>0.96</sub> Pr <sub>0.03</sub> Yb <sub>0.01</sub> (MoO <sub>4</sub> ) <sub>2</sub> | 6.40              | 1.80             | 102             |
| NaLa <sub>0.94</sub> Pr <sub>0.03</sub> Yb <sub>0.03</sub> (MoO <sub>4</sub> ) <sub>2</sub> | 6.38              | 2.14             | 103             |
| NaLa <sub>0.92</sub> Pr <sub>0.03</sub> Yb <sub>0.05</sub> (MoO <sub>4</sub> ) <sub>2</sub> | 6.33              | 2.91             | 104             |
| NaLa <sub>0.89</sub> Pr <sub>0.03</sub> Yb <sub>0.08</sub> (MoO <sub>4</sub> ) <sub>2</sub> | 6.17              | 5.36             | 106             |
| NaLa <sub>0.86</sub> Pr <sub>0.03</sub> Yb <sub>0.11</sub> (MoO <sub>4</sub> ) <sub>2</sub> | 6.01              | 7.82             | 108             |
| NaLa <sub>0.83</sub> Pr <sub>0.03</sub> Yb <sub>0.14</sub> (MoO <sub>4</sub> ) <sub>2</sub> | 5.96              | 8.58             | 109             |
